# Supplementary material
Source: PubMed Central journal article supplement (PMC5082301)
Supplement: mol-22-15_210_Satake_Suppl.pdf [file mol-22-15_210_Satake_Suppl.pdf]

# Novel Targeted Therapy for Precursor B-Cell Acute Lymphoblastic Leukemia: Anti-CD22 Antibody-MXD3 Antisense Oligonucleotide Conjugate

Noriko Satake,<sup>1,2</sup> Connie Duong,<sup>1,2</sup> Sakiko Yoshida,<sup>1,2</sup> Michael Oestergaard,<sup>3</sup> Cathy Chen,<sup>1,2</sup> Rachael Peralta,<sup>3</sup> Shuling Guo,<sup>3</sup> Punit P Seth,<sup>3</sup> Yueju Li,<sup>4</sup> Laurel Beckett,<sup>4</sup> Jong Chung,<sup>1</sup> Jan Nolta,<sup>2</sup> Nitin Nitin,<sup>5</sup> and Joseph M Tuscano<sup>6</sup>

Online address: <http://www.molmed.org>

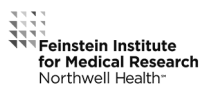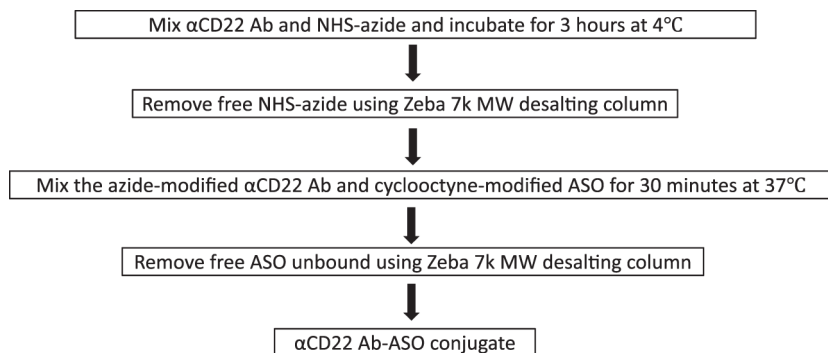

Supplementary Figure S1. Flow chart of the synthesis of the  $\alpha$ CD22 Ab-ASO conjugate.

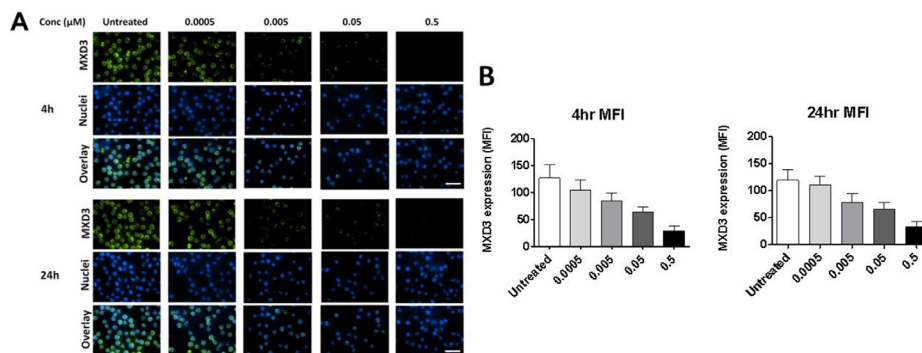

Supplementary Figure S2.  $\alpha$ CD22 Ab-MXD3 ASO conjugate demonstrates MXD3 knockdown in preB ALL cells in a concentration-dependent manner. (A) Reh cells were treated with the  $\alpha$ CD22 Ab-MXD3 ASO conjugate at four different concentrations (0.0005, 0.005, 0.05 and 0.5  $\mu$ mol/L of the Ab in the conjugate). MXD3 protein expression was measured at 4 and 24 h after the treatment. The overlay pictures show a composite image of both MXD3 protein (with Alexa488) and nuclei (with DAPI). Images were acquired at 40x magnification/1.4 numerical aperture at room temperature using a Nikon Ti-U inverted microscope and NIS-Elements BR software. Scale bar indicates 50  $\mu$ m. The images shown are from one representative experiment out of three experiments. (B) Mean fluorescence intensity (MFI) was used to quantify MXD3 protein expression from (A). Each bar represents the average MFI of all measured cells per treatment type from three independent experiments. Error bars represent SEM (n = 3). (Overall ANOVA  $p < 0.001$  for both A and B).



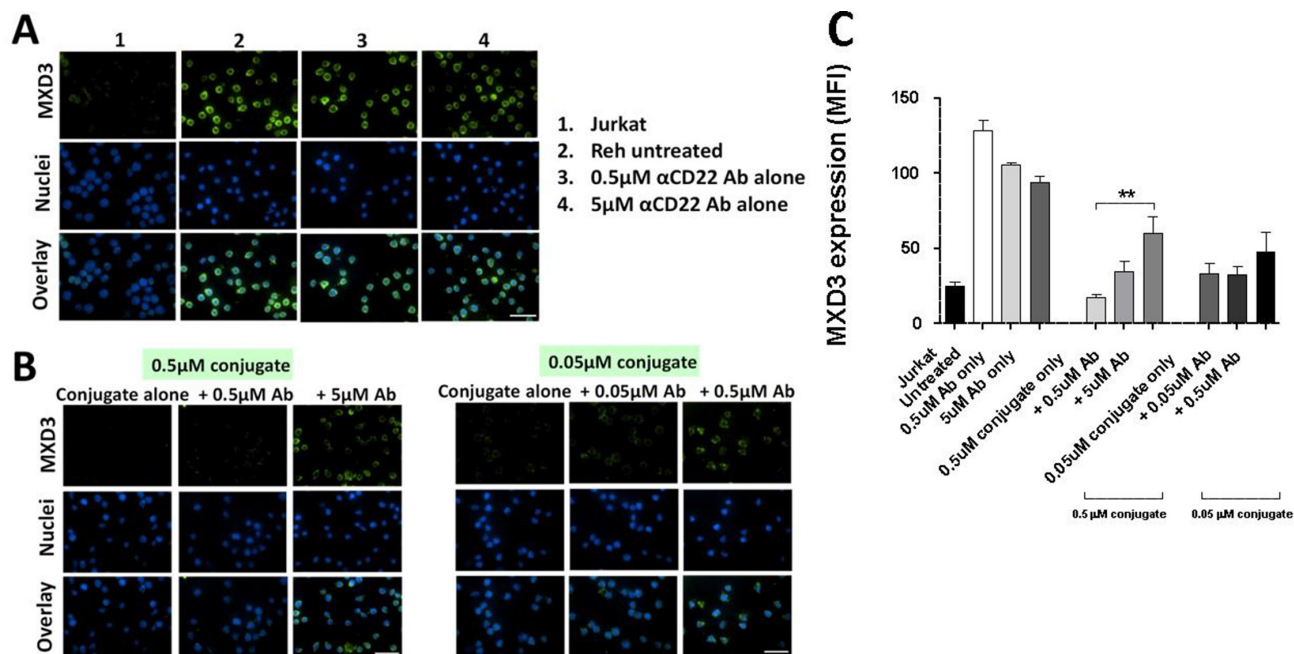

**Supplementary Figure S4.** The  $\alpha$ CD22 Ab-MXD3 ASO conjugate, but not naked  $\alpha$ CD22 Ab, shows MXD3 knockdown. (A) Treatment of Reh cells with the  $\alpha$ CD22 Ab only at 0.5  $\mu$ mol/L or 5  $\mu$ mol/L did not show significant MXD3 knockdown. Jurkat cells were used as a negative control for MXD3 expression. (B) Reh cells were treated with the  $\alpha$ CD22 Ab-MXD3 ASO conjugate (0.5  $\mu$ mol/L or 0.05  $\mu$ mol/L) with or without cold  $\alpha$ CD22 Ab at indicated concentrations above. MXD3 knockdown by the conjugate treatment was partially inhibited when cold  $\alpha$ CD22 Ab was added simultaneously at the concentrations of equal or 10 times higher than the Ab concentration in the conjugate. Images were acquired at 40 $\times$  magnification/1.4 numerical aperture at room temperature using a Nikon Ti-U inverted microscope and NIS-Elements BR software. For both (A) and (B) the images shown are from one representative experiment out of three experiments. (C) MFI from (A) and (B). For 0.5  $\mu$ mol/L of the conjugate, the percentage knockdown was 86% of untreated. Addition of the Ab, at 0.5  $\mu$ mol/L or 5  $\mu$ mol/L, reduced the percentage MXD3 knockdown to 73% and 53%, respectively. For 0.05  $\mu$ mol/L of the conjugate, the percentage knockdown was 74% of untreated. Addition of the Ab, at 0.05  $\mu$ mol/L or 0.5  $\mu$ mol/L, reduced the percentage knockdown to 75% and 63%, respectively. MXD3 protein expression were measured at 4 h after treatment. Scale bar indicates 50  $\mu$ m. Error bars represent SEM (n = 3). Each bar represents the average MFI of all measured cells per treatment type from three independent experiments. MXD3 expression in cells treated with 0.5  $\mu$ mol/L conjugate only versus addition of 5  $\mu$ mol/L Ab (Overall ANOVA \*\* $p$  < 0.001, based on ln MFI, multiple comparison results shown).

**A**

**Reh leukemia model 1st and 2nd experiments**

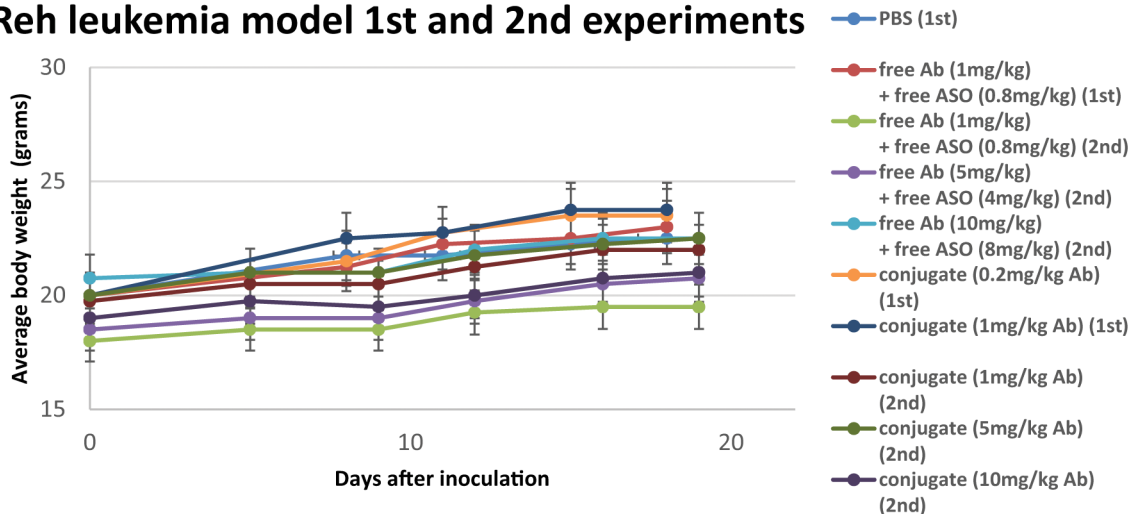

**B**

**Patient-derived leukemia model (Sample A)**

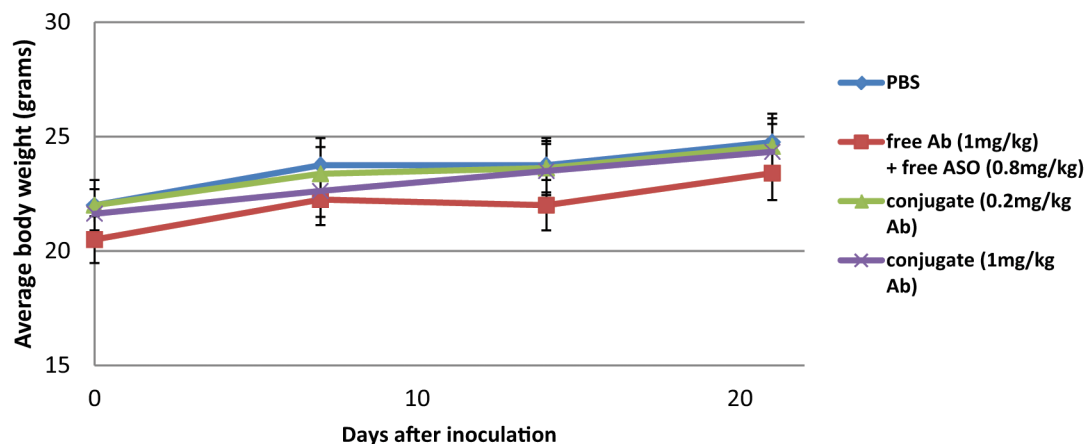

**Supplementary Figure S5.** Mice show stable weight gain during treatment. Average body weight of the mice during treatment in the Reh (A) and the patient sample A (B) experiments. None of the mice lost weight during the treatments.

**Supplementary Table S1.** HLA and CD22 expression of the cells harvested from leukemia xenograft models. Reh (A) and patient-derived leukemic cells (B and C) engrafted in the mice, respectively, showed high expression of HLA and CD22 as quantified by flow cytometry. \*indicates the samples which were fixed for subsequent analyses.

**A**

|                                           | Mouse | HLA% | CD22% | CD22/HLA |
|-------------------------------------------|-------|------|-------|----------|
| PBS                                       | 1     | 72.5 | 70.4  | 1.0      |
|                                           | 2     | 74.8 | 70.8  | 0.9      |
|                                           | 3     | 62.7 | 57.6  | 0.9      |
|                                           | 4     | 63.3 | 58.7  | 0.9      |
| Free Ab (1mg/kg)<br>+ free ASO (0.8mg/kg) | 1     | 73.6 | 52.4  | 0.7      |
|                                           | 2     | 82.7 | 72.7  | 0.9      |
|                                           | 3     | 90.0 | 77.0  | 0.9      |
|                                           | 4     | 80.0 | 93.2  | 1.2      |
|                                           | 5     | 92.4 | 79.9  | 0.9      |
|                                           | 6     | 92.6 | 77.4  | 0.8      |
|                                           | 7     | 90.5 | 74.7  | 0.8      |
|                                           | 8     | 92.8 | 79.1  | 0.9      |
| Free Ab (5mg/kg)<br>+ free ASO (4mg/kg)   | 1     | 86.3 | 83.8  | 1.0      |
|                                           | 2     | 90.7 | 84.1  | 0.9      |
|                                           | 3     | 91.3 | 82.2  | 0.9      |
|                                           | 4     | 91.2 | 82.3  | 0.9      |
| Free Ab (10mg/kg)<br>+ free ASO (8mg/kg)  | 1     | 91.9 | 71.0  | 0.8      |
|                                           | 2     | 90.1 | 82.4  | 0.9      |
|                                           | 3     | 91.0 | 87.6  | 1.0      |
|                                           | 4     | 78.0 | 60.2  | 0.8      |
| Conjugate (0.2mg/kg Ab)                   | 1     | 94.9 | 79.4  | 0.6      |
|                                           | 2     | 90.6 | 39.3  | 0.4      |
|                                           | 3     | 94.3 | 83.5  | 0.9      |
|                                           | 4     | 93.0 | 91.2  | 1.0      |
| Conjugate (1mg/kg Ab)                     | 1     | 96.2 | 83.2  | 0.9      |
|                                           | 2     | 84.2 | 72.3  | 0.9      |
|                                           | 3     | 79.4 | 69.3  | 0.9      |
|                                           | 4     | 82.6 | 59.2  | 0.7      |
|                                           | 5     | 91.2 | 77.5  | 0.8      |
|                                           | 6     | 89.7 | 77.3  | 0.9      |
|                                           | 7     | 93.6 | 88.9  | 0.9      |
|                                           | 8     | 93.7 | 77.9  | 0.8      |
| Conjugate (5mg/kg Ab)                     | 1     | 85.2 | 68.1  | 0.8      |
|                                           | 2     | 89.6 | 74.0  | 0.8      |
|                                           | 3     | 89.5 | 74.3  | 0.8      |
|                                           | 4     | 93.4 | 77.3  | 0.8      |
| Conjugate (10mg/kg Ab)                    | 1     | 89.8 | 78.8  | 0.9      |
|                                           | 2     | 89.9 | 80.2  | 0.9      |
|                                           | 3     | 83.1 | 68.7  | 0.8      |
|                                           | 4     | 90.0 | 75.3  | 0.8      |

*Continued on next page*

Supplementary Table S1. *Continued.*

**B**

|                                           | Mouse | HLA% | CD22% | CD22/HLA |   |
|-------------------------------------------|-------|------|-------|----------|---|
| PBS                                       | 1     | 99.0 | 93.1  | 0.9      | * |
|                                           | 2     | 93.0 | 93.0  | 1.0      | * |
|                                           | 3     | 96.4 | 77.5  | 0.8      | * |
|                                           | 4     | 96.6 | 22.9  | 0.4      | * |
|                                           | 5     | 94.5 | 79.8  | 0.8      | * |
|                                           | 6     | 90.1 | 58.9  | 0.7      | * |
|                                           | 7     | 94.5 | 62.8  | 0.7      | * |
|                                           | 8     | 92.0 | 65.5  | 0.7      | * |
| Free Ab (1mg/kg)<br>+ free ASO (0.8mg/kg) | 1     | 93.6 | 97.2  | 1.0      | * |
|                                           | 2     | 92.7 | 76.1  | 0.8      | * |
|                                           | 3     | 92.7 | 47.4  | 0.5      | * |
|                                           | 4     | 89.0 | 59.3  | 0.7      | * |
|                                           | 5     | 96.5 | 68.6  | 0.7      | * |
|                                           | 6     | 99.4 | 94.6  | 1.0      | * |
|                                           | 7     | 92.1 | 90.3  | 1.0      | * |
|                                           | 8     | 85.8 | 55.2  | 0.6      | * |
| Conjugate (0.2mg/kg Ab)                   | 1     | 90.0 | 95.3  | 1.1      |   |
|                                           | 2     | 94.3 | 83.4  | 0.9      |   |
|                                           | 3     | 94.2 | 93.9  | 1.0      |   |
|                                           | 4     | 94.4 | 84.4  | 0.9      |   |
|                                           | 5     | 93.8 | 86.1  | 0.9      |   |
|                                           | 6     | 92.0 | 87.8  | 1.0      |   |
|                                           | 7     | 96.0 | 94.2  | 1.0      |   |
|                                           | 8     | 97.6 | 96.5  | 1.0      |   |
| Conjugate (1mg/kg Ab)                     | 1     | 91.6 | 93.5  | 1.0      |   |
|                                           | 2     | 93.1 | 93.9  | 1.0      |   |
|                                           | 3     | 91.4 | 93.6  | 1.0      |   |
|                                           | 4     | 91.1 | 80.3  | 0.9      |   |
|                                           | 5     | 94.8 | 89.7  | 0.9      |   |
|                                           | 6     | 90.8 | 84.8  | 0.9      |   |
|                                           | 7     | 92.6 | 88.0  | 1.0      |   |
|                                           | 8     | 86.6 | 76.0  | 0.9      |   |

*Continued on next page*



Supplementary Table S1. *Continued.***C**

|                                           | Mouse | HLA% | CD22% | CD22/HLA |
|-------------------------------------------|-------|------|-------|----------|
| PBS                                       | 1     | 84.3 | 73.7  | 0.9      |
|                                           | 2     | 75.4 | 73.4  | 1.0      |
|                                           | 3     | 73.9 | 70.5  | 1.0      |
|                                           | 4     | 65.6 | 66.9  | 1.0      |
|                                           | 5     | 88.8 | 88.1  | 1.0      |
|                                           | 6     | 69.0 | 67.1  | 1.0      |
| Free Ab (1mg/kg)<br>+ free ASO (0.8mg/kg) | 1     | 87.8 | 78.9  | 0.9      |
|                                           | 2     | 87.6 | 78.5  | 0.9      |
|                                           | 3     | 90.9 | 84    | 0.9      |
|                                           | 4     | 88.8 | 81.9  | 0.9      |
|                                           | 5     | 82.5 | 76.6  | 0.9      |
|                                           | 6     | 90.3 | 74.6  | 0.8      |
| Conjugate (0.2mg/kg Ab)                   | 1     | 76.3 | 75.1  | 1.0      |
|                                           | 2     | 73.2 | 66.6  | 0.9      |
|                                           | 3     | 94.2 | 88.2  | 0.9      |
|                                           | 4     | 91.6 | 79.8  | 0.9      |
|                                           | 5     | 88.6 | 83    | 0.9      |
|                                           | 6     | 87.6 | 82.5  | 0.9      |
| Conjugate (1mg/kg Ab)                     | 1     | 77.5 | 73.3  | 0.9      |
|                                           | 2     | 74.5 | 69.8  | 0.9      |
|                                           | 3     | 80.2 | 73.2  | 0.9      |
|                                           | 4     | 87.1 | 82.3  | 0.9      |
|                                           | 5     | 85.6 | 74.7  | 0.9      |
|                                           | 6     | 87.9 | 79.3  | 0.9      |

**Supplementary Table S2.** Characteristics of the two primary leukemia samples used in the study. WBC: white blood cells, CNS: central nervous system, MRD: minimal residual disease, CD22 expression: the numbers indicate % relative to HLA expression on the cells at inoculation and at harvest (in parenthesis) for the xenograft models. MXD3 expression was tested on the primary cells (before xenograft).

|                                           | Sample A                              | Sample B                              |
|-------------------------------------------|---------------------------------------|---------------------------------------|
| initial WBC ( $\times 10^3/\mu\text{L}$ ) | 439.6                                 | 2.2                                   |
| Age (year old) / sex                      | 4 / male                              | 16 / male                             |
| CNS disease                               | Negative                              | Negative                              |
| Cytogenetics                              | 47,XY,+mar(13)/46,XY(7)               | No metaphase cells                    |
| MRD on day 29 bone marrow                 | Negative                              | Negative                              |
| Morphology                                | Lymphoblast                           | Lymphoblast                           |
| Phenotype                                 | CD10, 19, 20, TdT,<br>cCD79a positive | CD10, 19, 20, TdT,<br>cCD79a positive |
| CD22 expression* %                        | 92 (87)                               | 92 (93)                               |
| MXD3 expression (relative to Reh) %       | 148                                   | 246                                   |

**Supplementary Table S3.** Blood test results of the mice from the patient-derived leukemia xenograft model. (A) CBC and (B) chemistry panels for the patient-derived leukemia xenograft mice during treatment. One representative mouse from each treatment arm was tested weekly.

**A**

| PBS                              | Days after leukemia inoculation |       |       |       | free Ab (1mg/kg) + free ASO (0.8mg/kg) | Days after leukemia inoculation |       |       |       |
|----------------------------------|---------------------------------|-------|-------|-------|----------------------------------------|---------------------------------|-------|-------|-------|
|                                  | 0                               | 7     | 14    | 28    |                                        | 0                               | 7     | 14    | 28    |
| WBC (K/ul)                       | 1.3                             | 0.8   | 1.2   | 6.2   | WBC (K/ul)                             | 1.1                             | 0.8   | 2.6   | 1.5   |
| Absolute Neutrophil cells (K/ul) | 0.7                             | 0.4   | 0.9   | 1.3   | Absolute Neutrophil cells (K/ul)       | 0.5                             | 0.2   | 0.4   | 0.1   |
| Absolute Lymphocyte cells (K/ul) | 0.3                             | 0.2   | 0.2   | 2.7   | Absolute Lymphocyte cells (K/ul)       | 0.3                             | 0.3   | 0.6   | 1.1   |
| Absolute Monocyte cells (K/ul)   | 0.3                             | 0.2   | 0.1   | 2.1   | Absolute Monocyte cells (K/ul)         | 0.3                             | 0.2   | 1.5   | 0.3   |
| Absolute Eosinophil cells (K/ul) | 0.0                             | 0.0   | 0.0   | 0.0   | Absolute Eosinophil cells (K/ul)       | 0.0                             | 0.0   | 0.1   | 0.0   |
| Absolute Basophil cells (K/ul)   | 0.0                             | 0.0   | 0.0   | 0.0   | Absolute Basophil cells (K/ul)         | 0.0                             | 0.0   | 0.0   | 0.0   |
| Neutrophil %                     | 52.2                            | 42.9  | 74.1  | 21.4  | Neutrophil %                           | 44.4                            | 26.8  | 16.8  | 5.7   |
| Lymphocyte %                     | 22.7                            | 28.2  | 14.7  | 43.3  | Lymphocyte %                           | 25.2                            | 40.8  | 22.3  | 75.3  |
| Monocyte %                       | 23.3                            | 24.4  | 8.3   | 34.6  | Monocyte %                             | 27.8                            | 30.4  | 57.9  | 17.7  |
| Eosinophil %                     | 1.3                             | 4.3   | 3.0   | 0.6   | Eosinophil %                           | 2.5                             | 0.8   | 2.4   | 1.1   |
| Basophil %                       | 0.5                             | 0.2   | 0.0   | 0.2   | Basophil %                             | 0.2                             | 1.2   | 0.6   | 0.2   |
| RBC (M/ul)                       | 8.5                             | 9.8   | 10.3  | 9.9   | RBC (M/ul)                             | 9.8                             | 8.3   | 10.2  | 6.6   |
| Hemoglobin (g/dL)                | 13.4                            | 13.4  | 15.0  | 13.3  | Hemoglobin (g/dL)                      | 14.1                            | 11.7  | 14.8  | 9.4   |
| Hematocrit %                     | 36.3                            | 43.8  | 51.9  | 43.3  | Hematocrit %                           | 41.7                            | 36.9  | 51.9  | 29.1  |
| MCV (fL)                         | 42.8                            | 44.8  | 50.4  | 43.8  | MCV (fL)                               | 42.6                            | 44.2  | 50.7  | 43.8  |
| MCH (pg)                         | 15.8                            | 13.7  | 14.6  | 13.4  | MCH (pg)                               | 14.4                            | 14.0  | 14.5  | 14.2  |
| MCHC (g/dL)                      | 36.9                            | 30.6  | 28.9  | 30.7  | MCHC (g/dL)                            | 33.8                            | 31.7  | 28.5  | 32.3  |
| RDW %                            | 18.2                            | 18.1  | 19.1  | 19.0  | RDW %                                  | 17.9                            | 18.2  | 18.7  | 17.7  |
| Platelets (K/ul)                 | 784.0                           | 632.0 | 990.0 | 317.0 | Platelets (K/ul)                       | 832.0                           | 494.0 | 620.0 | 432.0 |
| MPV (fL)                         | 5.7                             | 5.5   | 5.0   | 5.4   | MPV (fL)                               | 5.6                             | 5.5   | 5.1   | 5.2   |
| Presence of clots                | None                            | None  | None  | None  | Presence of clots                      | None                            | None  | None  | None  |

  

| conjugate (0.2mg/kg Ab)          | Days after leukemia inoculation |       |       |       | conjugate (1mg/kg Ab)            | Days after leukemia inoculation |       |       |       |
|----------------------------------|---------------------------------|-------|-------|-------|----------------------------------|---------------------------------|-------|-------|-------|
|                                  | 0                               | 7     | 14    | 28    |                                  | 0                               | 7     | 14    | 28    |
| WBC (K/ul)                       | 0.7                             | 1.0   | 1.0   | 1.0   | WBC (K/ul)                       | 1.1                             | 0.7   | 1.2   | 1.1   |
| Absolute Neutrophil cells (K/ul) | 0.2                             | 0.6   | 0.2   | 0.1   | Absolute Neutrophil cells (K/ul) | 0.4                             | 0.3   | 0.1   | 0.3   |
| Absolute Lymphocyte cells (K/ul) | 0.3                             | 0.2   | 0.3   | 0.4   | Absolute Lymphocyte cells (K/ul) | 0.3                             | 0.2   | 0.5   | 0.2   |
| Absolute Monocyte cells (K/ul)   | 0.3                             | 0.2   | 0.5   | 0.4   | Absolute Monocyte cells (K/ul)   | 0.3                             | 0.2   | 0.5   | 0.6   |
| Absolute Eosinophil cells (K/ul) | 0.0                             | 0.0   | 0.0   | 0.0   | Absolute Eosinophil cells (K/ul) | 0.0                             | 0.0   | 0.1   | 0.0   |
| Absolute Basophil cells (K/ul)   | 0.0                             | 0.0   | 0.0   | 0.0   | Absolute Basophil cells (K/ul)   | 0.0                             | 0.0   | 0.0   | 0.0   |
| Neutrophil %                     | 28.6                            | 60.3  | 23.5  | 14.2  | Neutrophil %                     | 38.7                            | 40.3  | 11.0  | 22.0  |
| Lymphocyte %                     | 35.6                            | 22.5  | 28.6  | 44.3  | Lymphocyte %                     | 26.6                            | 28.2  | 40.7  | 19.6  |
| Monocyte %                       | 33.5                            | 14.5  | 44.8  | 39.1  | Monocyte %                       | 28.5                            | 29.1  | 42.5  | 56.6  |
| Eosinophil %                     | 1.8                             | 2.3   | 3.0   | 2.0   | Eosinophil %                     | 3.9                             | 2.3   | 5.2   | 1.8   |
| Basophil %                       | 0.5                             | 0.3   | 0.2   | 0.3   | Basophil %                       | 2.3                             | 0.2   | 0.7   | 0.0   |
| RBC (M/ul)                       | 8.6                             | 10.4  | 9.5   | 9.2   | RBC (M/ul)                       | 9.3                             | 9.9   | 8.7   | 9.1   |
| Hemoglobin (g/dL)                | 12.3                            | 14.5  | 14.1  | 12.7  | Hemoglobin (g/dL)                | 13.5                            | 13.9  | 13.0  | 12.9  |
| Hematocrit %                     | 37.1                            | 47.6  | 49.0  | 40.6  | Hematocrit %                     | 40.0                            | 43.9  | 44.7  | 41.2  |
| MCV (fL)                         | 43.1                            | 46.0  | 51.5  | 44.2  | MCV (fL)                         | 43.2                            | 44.2  | 51.7  | 45.1  |
| MCH (pg)                         | 14.3                            | 14.0  | 14.8  | 13.8  | MCH (pg)                         | 14.6                            | 14.0  | 15.0  | 14.1  |
| MCHC (g/dL)                      | 33.2                            | 30.5  | 28.8  | 31.3  | MCHC (g/dL)                      | 33.8                            | 31.7  | 29.1  | 31.3  |
| RDW %                            | 17.8                            | 18.5  | 19.1  | 17.6  | RDW %                            | 17.5                            | 17.7  | 19.2  | 18.0  |
| Platelets (K/ul)                 | 449.0                           | 146.0 | 758.0 | 458.0 | Platelets (K/ul)                 | 768.0                           | 179.0 | 381.0 | 733.0 |
| MPV (fL)                         | 5.7                             | 6.1   | 5.2   | 5.0   | MPV (fL)                         | 5.8                             | 5.9   | 5.3   | 5.0   |
| Presence of clots                | clot                            | None  | None  | None  | Presence of clots                | None                            | None  | None  | None  |

**B**

| PBS                        | Days after leukemia inoculation |       |       |       | free Ab (1mg/kg) + free ASO (0.8mg/kg) | Days after leukemia inoculation |       |       |       |
|----------------------------|---------------------------------|-------|-------|-------|----------------------------------------|---------------------------------|-------|-------|-------|
|                            | 0                               | 7     | 14    | 28    |                                        | 0                               | 7     | 14    | 28    |
| Albumin g/dL               | 3.6                             | 3.8   | 4.1   | 3.3   | Albumin g/dL                           | 3.9                             | 4.1   | 3.7   | 3.6   |
| Alkaline Phosphatase U/L   | 41.8                            | 0.2   | 73.6  | 68.7  | Alkaline Phosphatase U/L               | 72.9                            | 61.0  | 9.0   | 6.3   |
| Alanine transaminase U/L   | 32.2                            | 67.2  | 36.2  | 37.8  | Alanine transaminase U/L               | 38.9                            | 40.4  | 42.2  | 46.5  |
| Aspartate transaminase U/L | 121.3                           | 355.2 | 126.0 | 148.5 | Aspartate transaminase U/L             | 154.1                           | 170.2 | 203.8 | 213.3 |
| Blood Urea Nitrogen mg/dL  | 25.3                            | 32.8  | 21.2  | 15.6  | Blood Urea Nitrogen mg/dL              | 26.0                            | 25.8  | 34.0  | 23.7  |
| Creatinine mg/dL           | 0.1                             | 0.1   | 0.2   | 0.2   | Creatinine mg/dL                       | 0.2                             | 0.2   | 0.2   | 0.3   |
| Total Bilirubin mg/dL      | 0.2                             | 0.0   | 0.1   | 0.0   | Total Bilirubin mg/dL                  | 0.1                             | 0.1   | 0.0   | 0.0   |
| Total Protein g/dL         | 5.5                             | 6.8   | 5.8   | 5.3   | Total Protein g/dL                     | 5.7                             | 6.2   | 6.5   | 6.0   |
| Hemolysis                  | 1+                              | 2+    | 3+    | 2+    | Hemolysis                              | 1+                              | 2+    | 3+    | 2+    |

  

| conjugate (0.2mg/kg Ab)    | Days after leukemia inoculation |       |       |      | conjugate (1mg/kg Ab)      | Days after leukemia inoculation |       |       |       |
|----------------------------|---------------------------------|-------|-------|------|----------------------------|---------------------------------|-------|-------|-------|
|                            | 0                               | 7     | 14    | 28   |                            | 0                               | 7     | 14    | 28    |
| Albumin g/dL               | 3.7                             | 3.9   | 3.9   | 3.2  | Albumin g/dL               | 3.8                             | 3.8   | 2.9   | 3.5   |
| Alkaline Phosphatase U/L   | 42.2                            | 56.0  | 15.4  | <0.3 | Alkaline Phosphatase U/L   | 62.0                            | <0.1  | <0.1  | 72.0  |
| Alanine transaminase U/L   | 35.2                            | 63.4  | 47.6  | 23.7 | Alanine transaminase U/L   | 29.5                            | 64.8  | 45.1  | 27.0  |
| Aspartate transaminase U/L | 119.4                           | 367.4 | 221.8 | 97.5 | Aspartate transaminase U/L | 81.8                            | 338.4 | 235.4 | 109.2 |
| Blood Urea Nitrogen mg/dL  | 30.6                            | 21.0  | 26.4  | 21.3 | Blood Urea Nitrogen mg/dL  | 28.5                            | 23.4  | 24.2  | 21.0  |
| Creatinine mg/dL           | 0.2                             | 0.3   | 0.1   | 0.1  | Creatinine mg/dL           | 0.2                             | 0.1   | 0.8   | 0.2   |
| Total Bilirubin mg/dL      | 0.1                             | 0.1   | 0.1   | 0.1  | Total Bilirubin mg/dL      | 0.1                             | 0.0   | 0.1   | 0.1   |
| Total Protein g/dL         | 5.8                             | 5.7   | 6.8   | 4.8  | Total Protein g/dL         | 5.4                             | 7.3   | 5.5   | 5.2   |
| Hemolysis                  | 1+                              | 2+    | 3+    | 2+   | Hemolysis                  | 1+                              | 2+    | 3+    | 2+    |
